# Supplementary material
Source: PubMed Central journal article supplement (PMC5748504)
Supplement: 10.1194_M080432_jlr.M080432-2.pdf [file 10.1194_M080432_jlr.M080432-2.pdf]

## Evidence of hydrocarbon nanodrops in highly ordered Stratum Corneum model membranes

Adrian Paz Ramos,<sup>†</sup> Gert Gooris,<sup>‡</sup> Joke Bouwstra,<sup>‡</sup> Michel Lafleur<sup>†\*</sup>

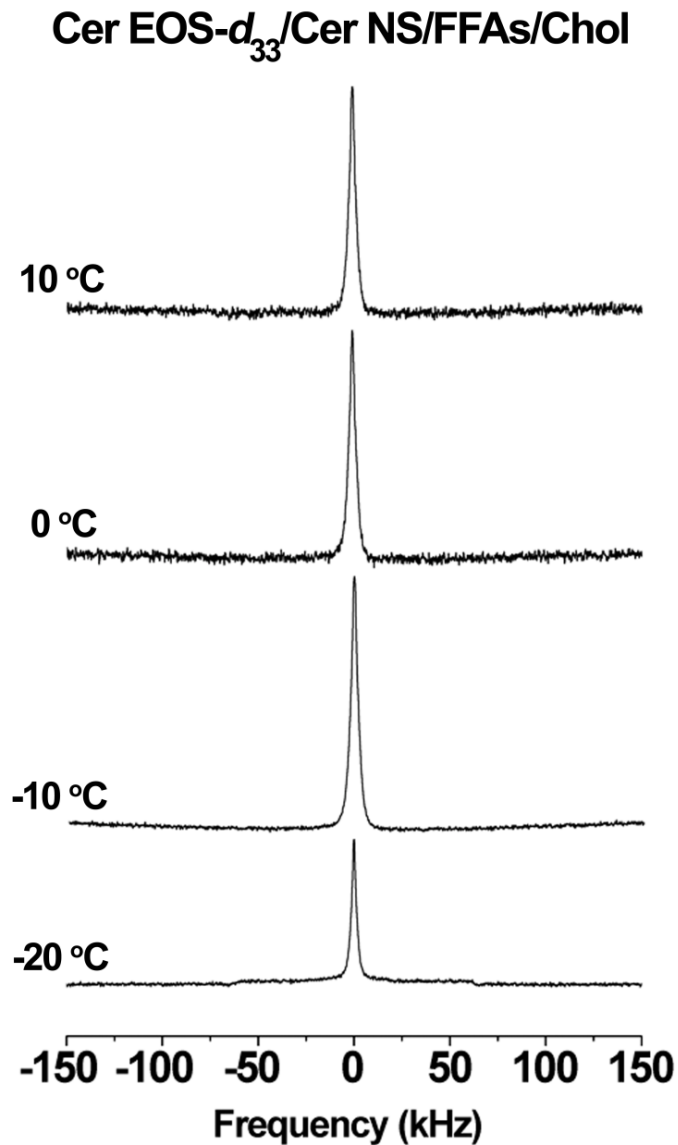

**Supplemental Figure S2.**  $^2\text{H}$ -NMR spectra of the dehydrated Cer EOS- $d_{33}$ /Cer NS/FFAs/Chol mixture measured at different temperatures.
