# Supplementary material
Source: PubMed Central journal article supplement (PMC5748504)
Supplement: 10.1194_M080432_jlr.M080432-3.pdf [file 10.1194_M080432_jlr.M080432-3.pdf]

# Evidence of hydrocarbon nanodrops in highly ordered Stratum Corneum model membranes

Adrian Paz Ramos,<sup>†</sup> Gert Gooris,<sup>‡</sup> Joke Bouwstra,<sup>‡</sup> Michel Lafleur<sup>†\*</sup>

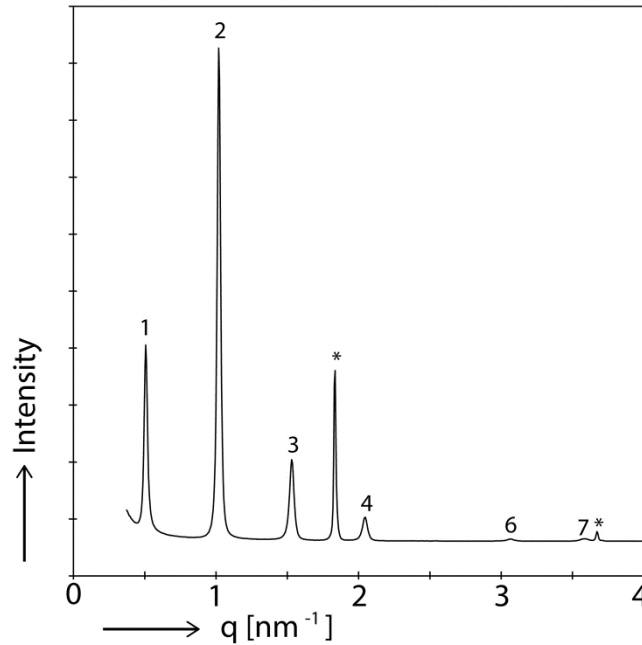

**Supplemental Figure S1.** SAXD patterns of the Cer EOS/Cer NS/FFAs/Chol mixture, showing the LPP formation. The \* indicates the peaks associated with crystalline cholesterol. Diffraction peaks denoted by 1,2,3, 4, 6 and 7 are the 1<sup>st</sup>, 2<sup>nd</sup>, 3<sup>rd</sup>, 4<sup>th</sup>, 6<sup>th</sup> and 7<sup>th</sup> order attributed to the LPP. The repeat distance is 12.4 nm. This value is calculated from the positions of the 1<sup>st</sup>, 2<sup>nd</sup>, 3<sup>rd</sup> and 4<sup>th</sup> order located at q-values of 0.507, 1.01, 1.53 and 2.04 nm<sup>-1</sup>, respectively.
